# Supplementary material for: The Secretome Analysis of Activated Human Renal Fibroblasts Revealed Beneficial Effect of the Modulation of the Secreted Peptidyl-Prolyl Cis-Trans Isomerase A in Kidney Fibrosis
Source: PubMed Central journal article supplement (PMC7407823; doi:10.3390/cells9071724), 2020-07-18
Supplement: cells-09-01724-s001.pdf [file cells-09-01724-s001.pdf]

Supplemental Material

Supplemental Figure 1

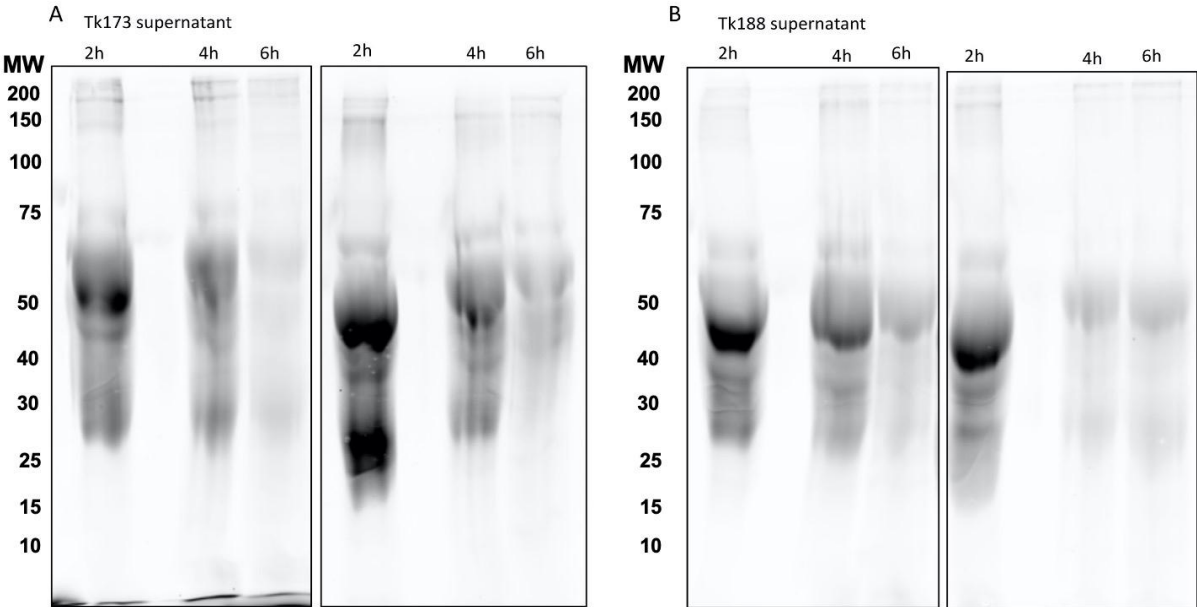

Supplemental Figure 1

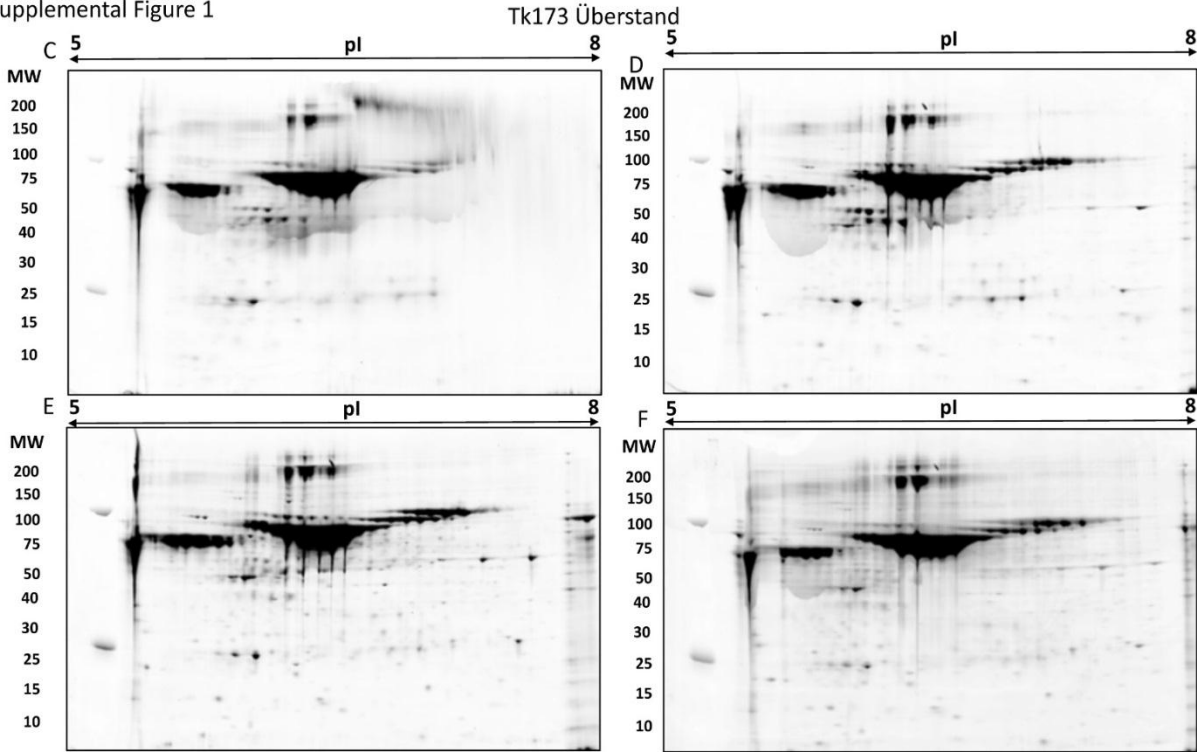

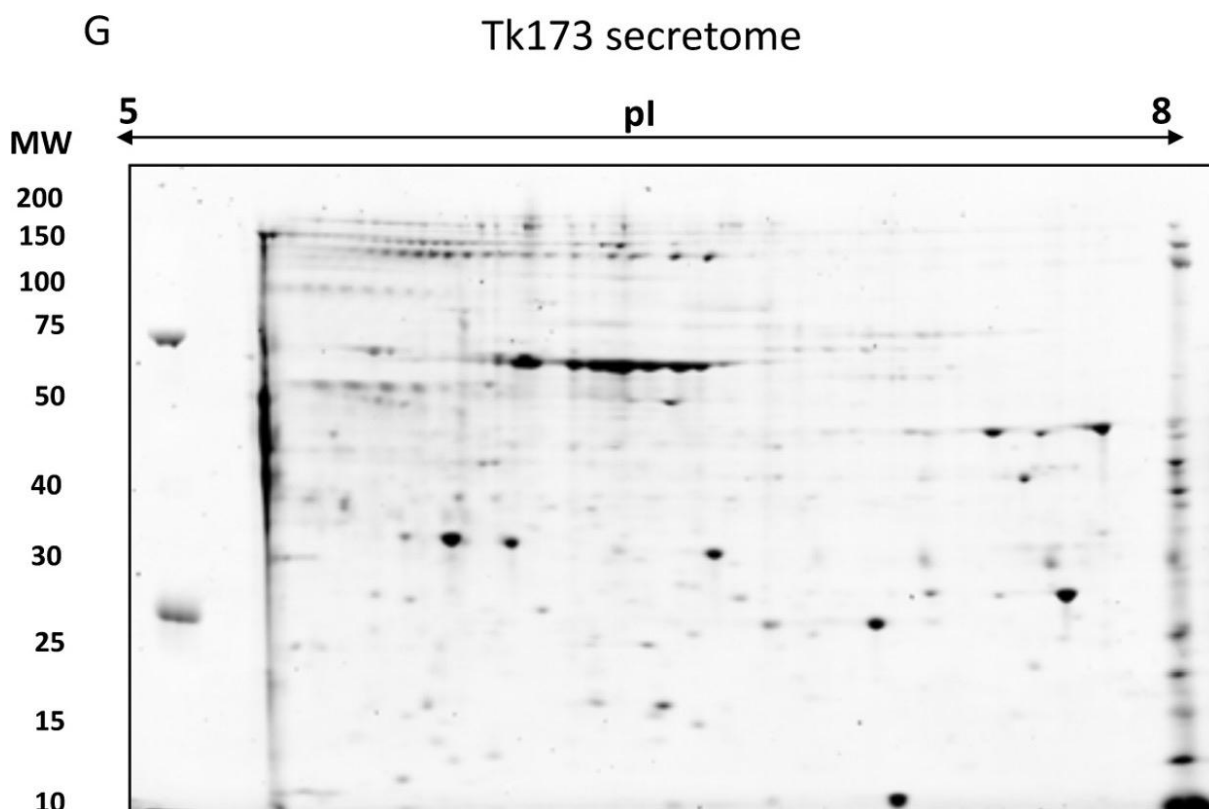

**Figure S1.** Secretome enrichment: protocol optimization. 1D SDS-PAGE documentation of washing steps: Culture medium was substituted with FCS-free medium, which was changed every 2 h. The supernatants were then collected, and the proteins isolated and separated in 1D SDS-PAGE ((A) TK173 and (B) TK188). Proteins were stained with Flamingo fluorescent gel stain. Two-dimensional pattern of the proteins isolated from supernatant of TK173, (C) 2 h, (D) 4 h, (E) 6 h, and (F) 8 h after changing to FCS-free medium. (G) Cell secretome collected 24 h after elimination of the contaminating FCS-proteins with different washing steps. Proteins were stained with Flamingo fluorescent gel stain.

Supplemental Figure 2

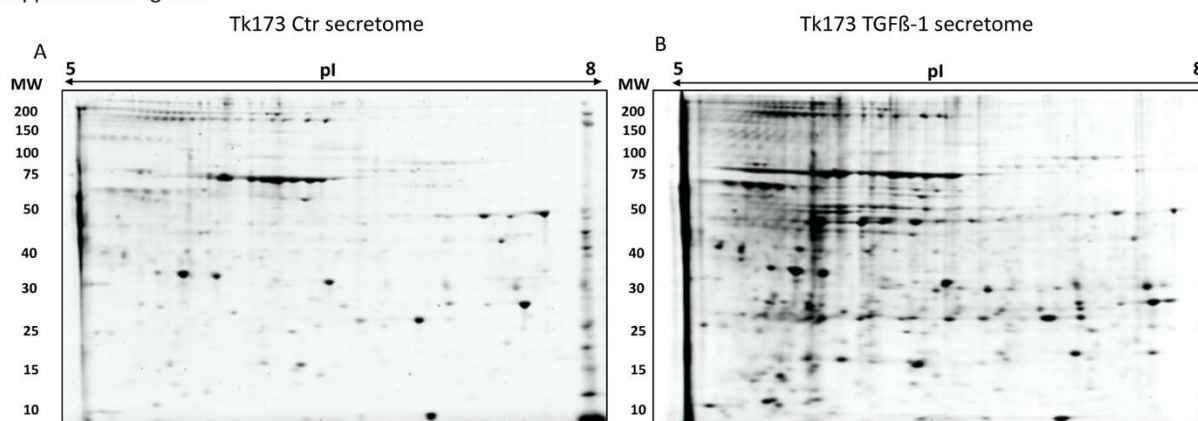

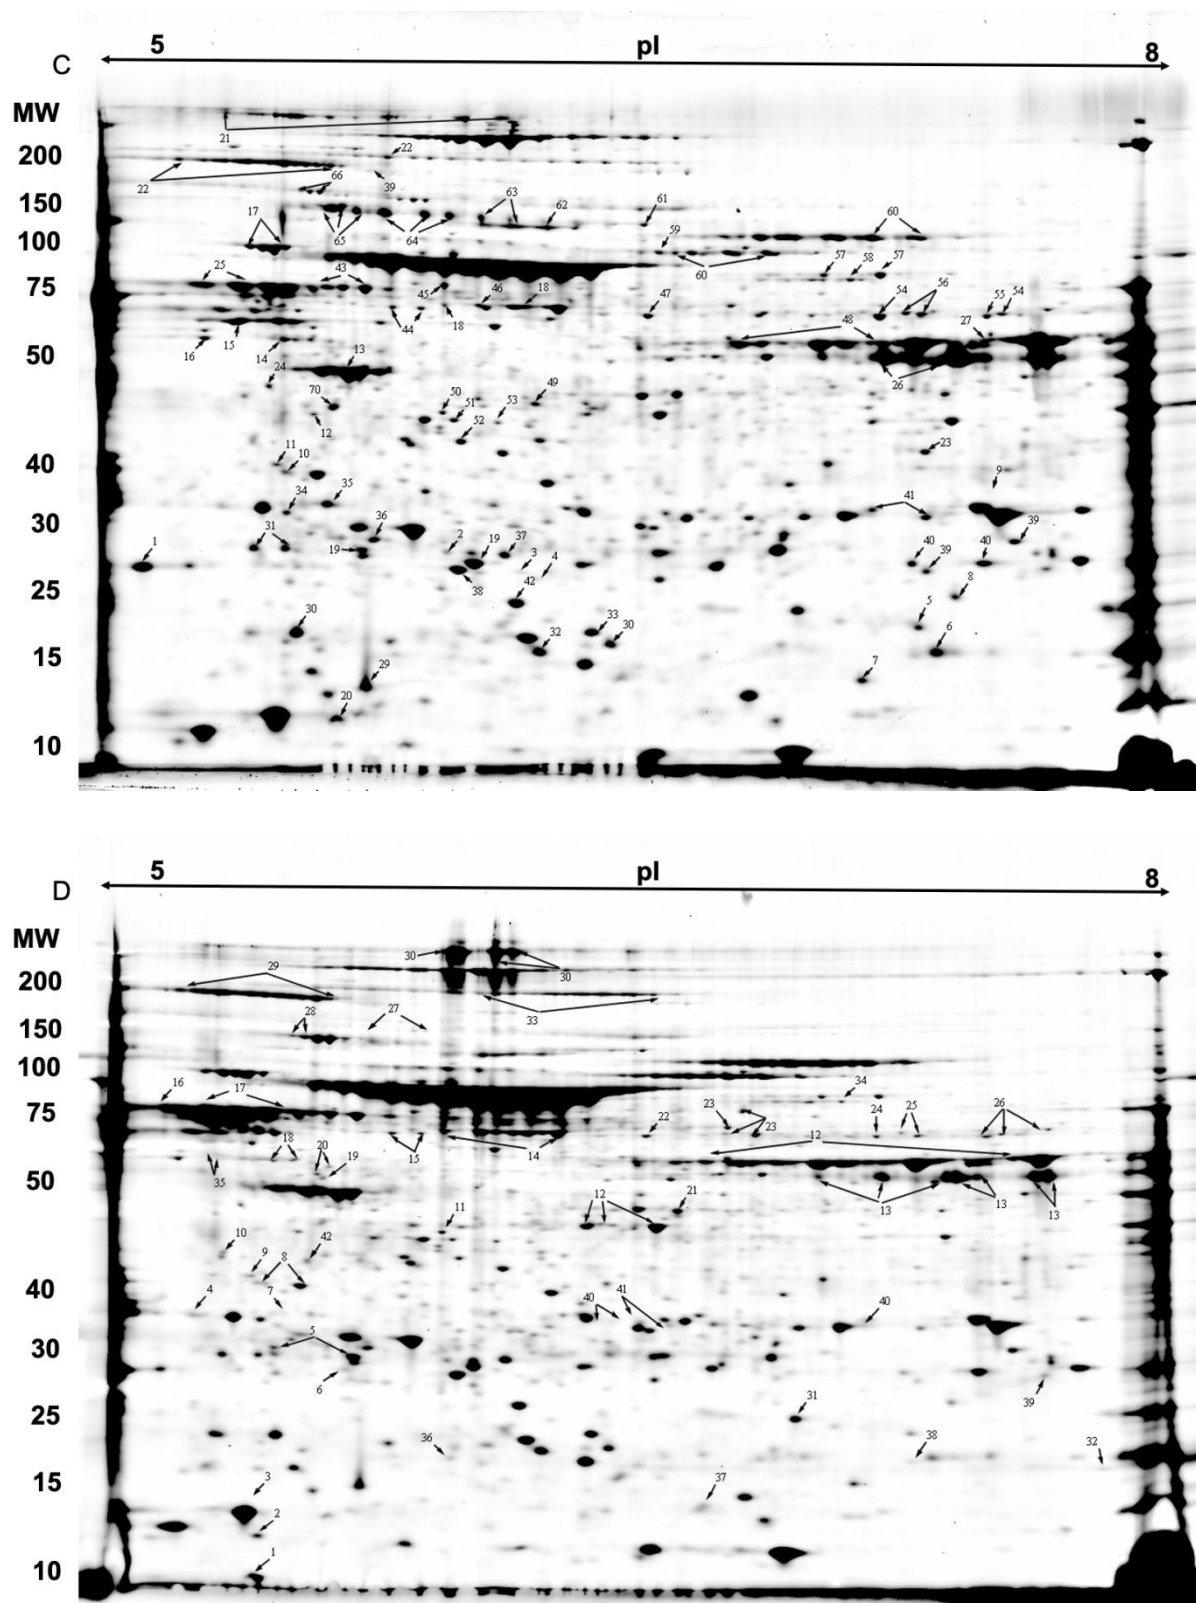

**Figure S2.** 2-DE reference maps of secretomes; 150  $\mu$ g proteins were loaded on an 11 cm IPG strip with a linear pH gradient PI 5–8 for IEF; 12% SDS-polyacrylamide gels were used for the second dimension. Proteins were stained with Flamingo fluorescent gel stain. Identified spots were assigned a number corresponding to that in their table. 2-DE maps from secretome of (A) TK173 control and (B) TGF $\beta$ 1-treated ones. The 2-DE patterns revealed an alteration of secretome in stimulated TK173. Secretome patterns from TK173 treated with (C) ANG II and (D) PDGF.

A

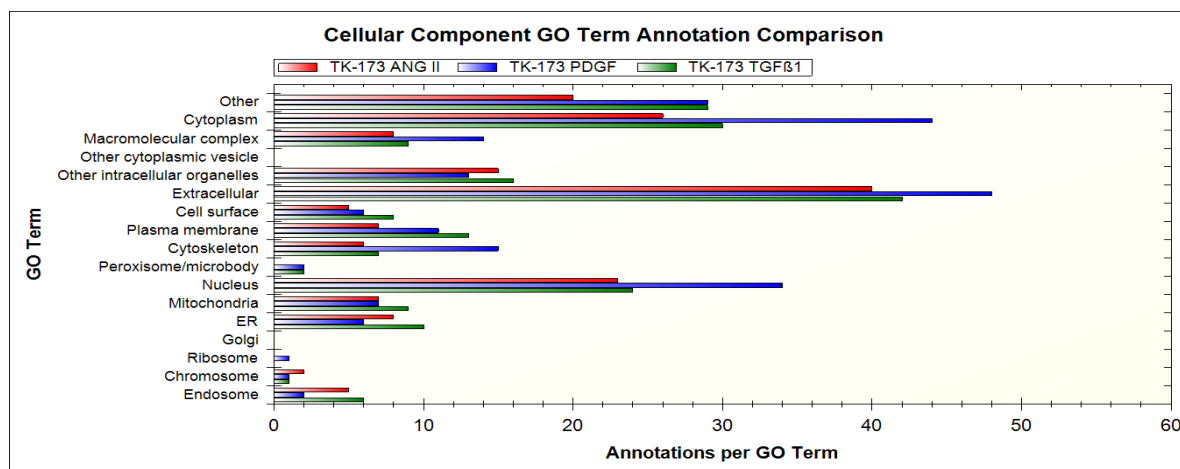

B TK173

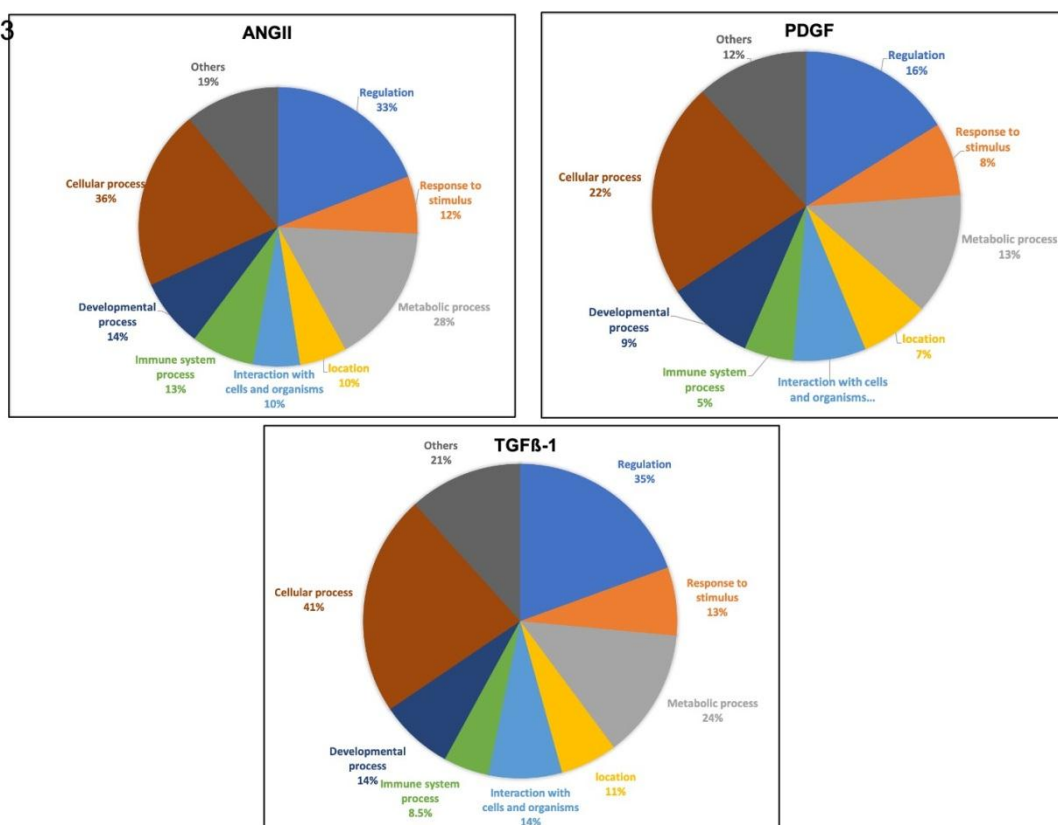

**Figure S3.** Classification of the differentially expressed proteins upon ANG II, TGFβ1, or PDGF treatment in TK173. (A) Bar charts of the cellular component analyzed by STRAP biological function analysis in which the identified proteins from all treatments in both cell types are involved. GO analysis of datasets shows a clear enrichment for extracellular proteins in TK173 secretome. (B) Pie charts illustrating the classification of the identified secretome protein according to their biological processes (STRAP GO annotations) and the treatment used.

Supplemental Figure 4

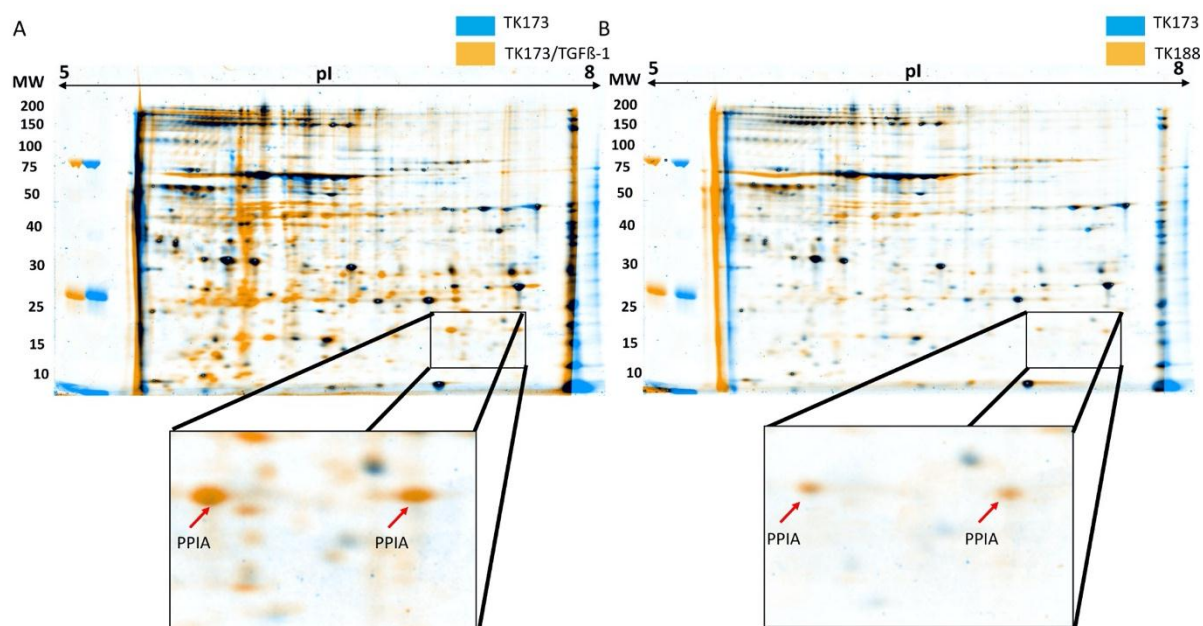

**Figure S4.** Two-dimensional pattern of total proteins isolated from TK173, TK173/TGFβ1, and TK188 secretomes. (A) Overlapping of the 2D maps from TK173 and TK173/TGFβ1 secretomes. (B) Overlapping of 2D maps from TK173 and TK188 secretomes. Close-up regions showing the PPIA spots in the secretome from both overlapping. The proteins (150 μg) were loaded and separated by 2-DE according to PI and MW. The protein spots were visualized by Flamingo fluorescent gel stain.

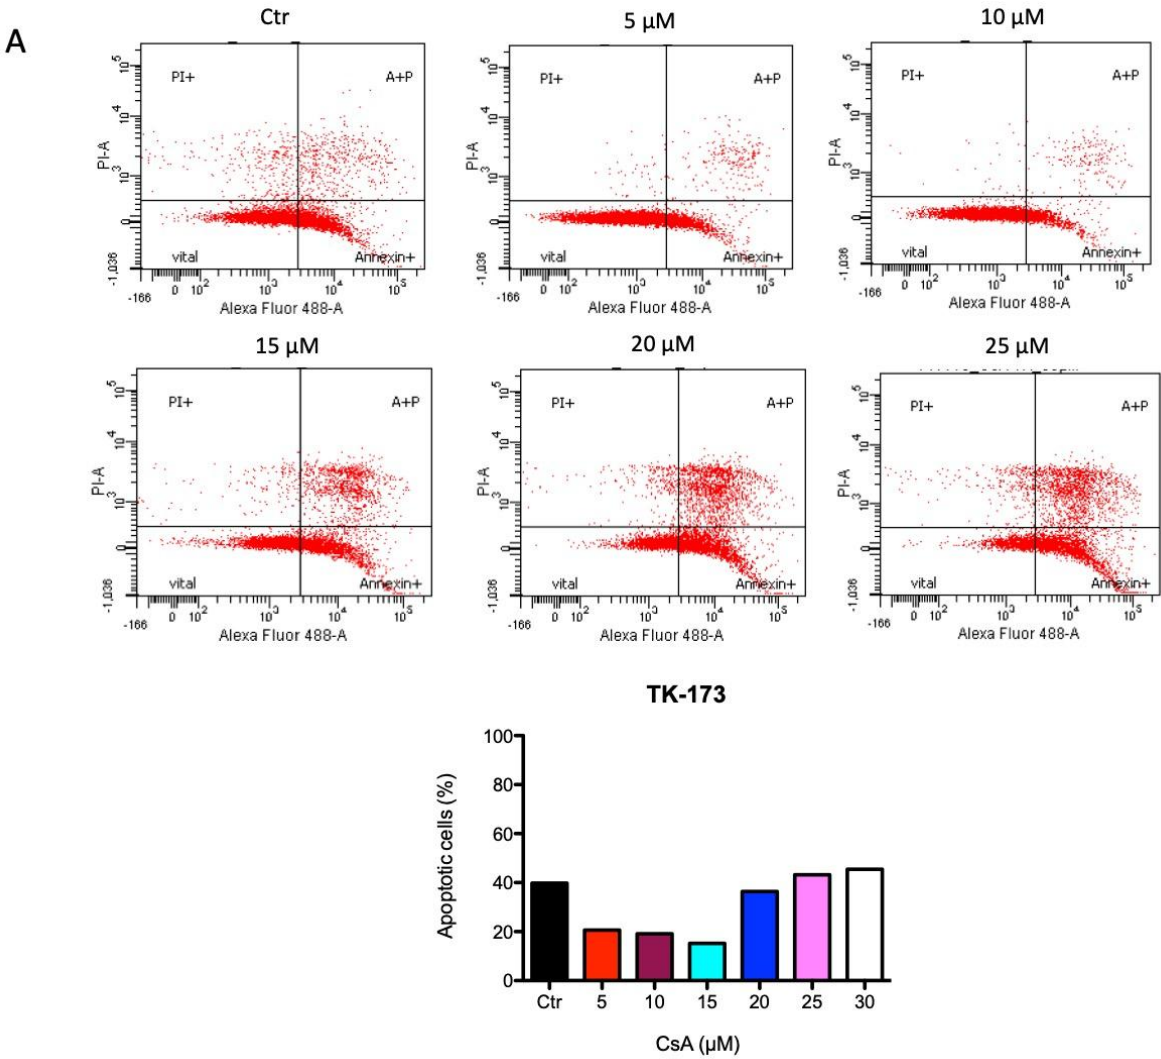

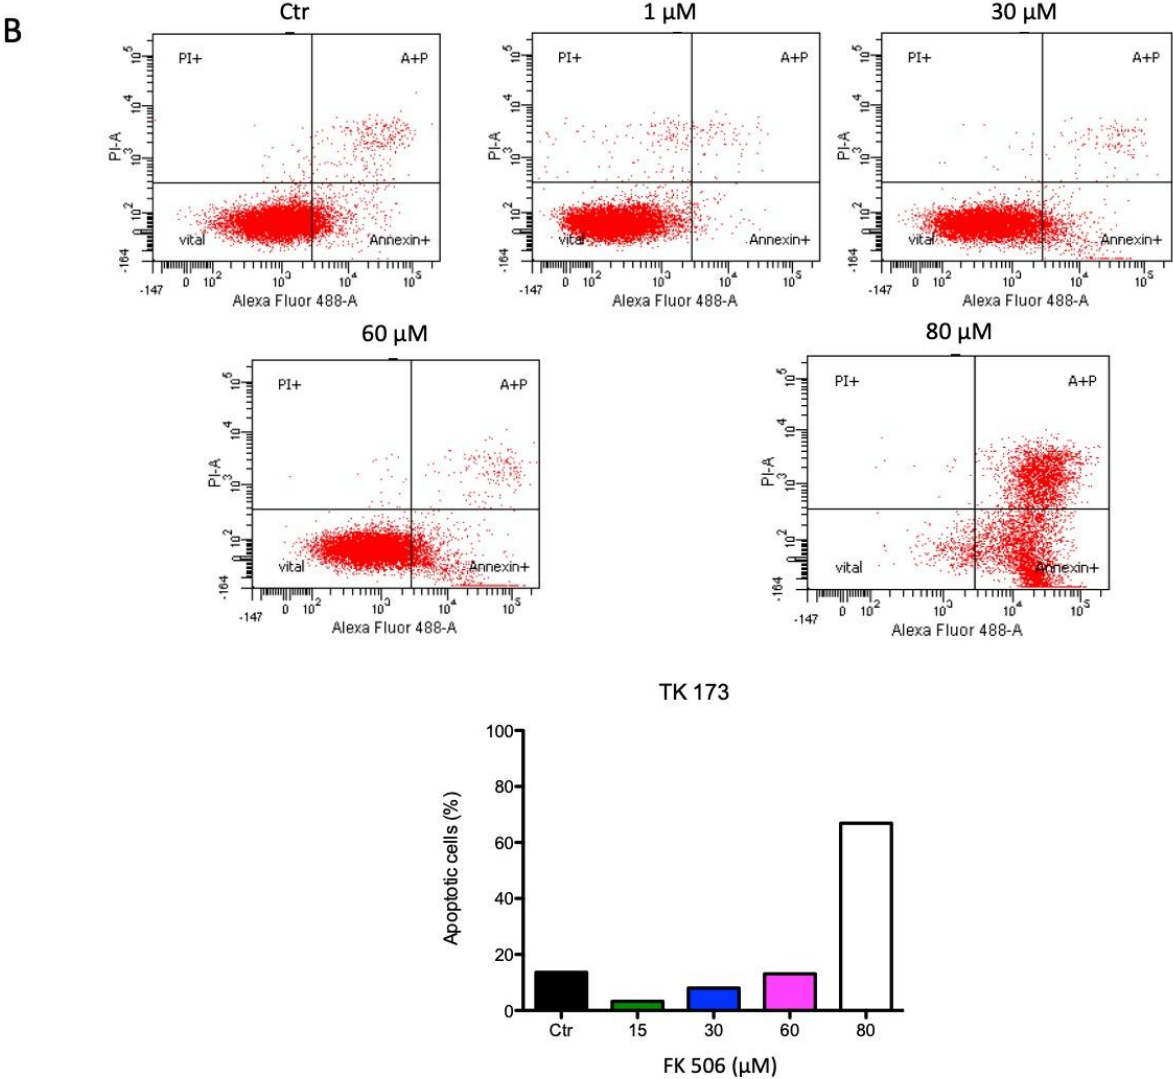

**Figure S5.** TK173 cells were treated with different doses of (A) CsA (5-30 μM) or (B) FK506 (15–80 μM) for 72 h and Annexin V/PI staining was performed to examine the apoptotic cells. Percentage of apoptotic cells after treatment with indicated doses of CsA or FK506 are presented in the form of a bar diagram.

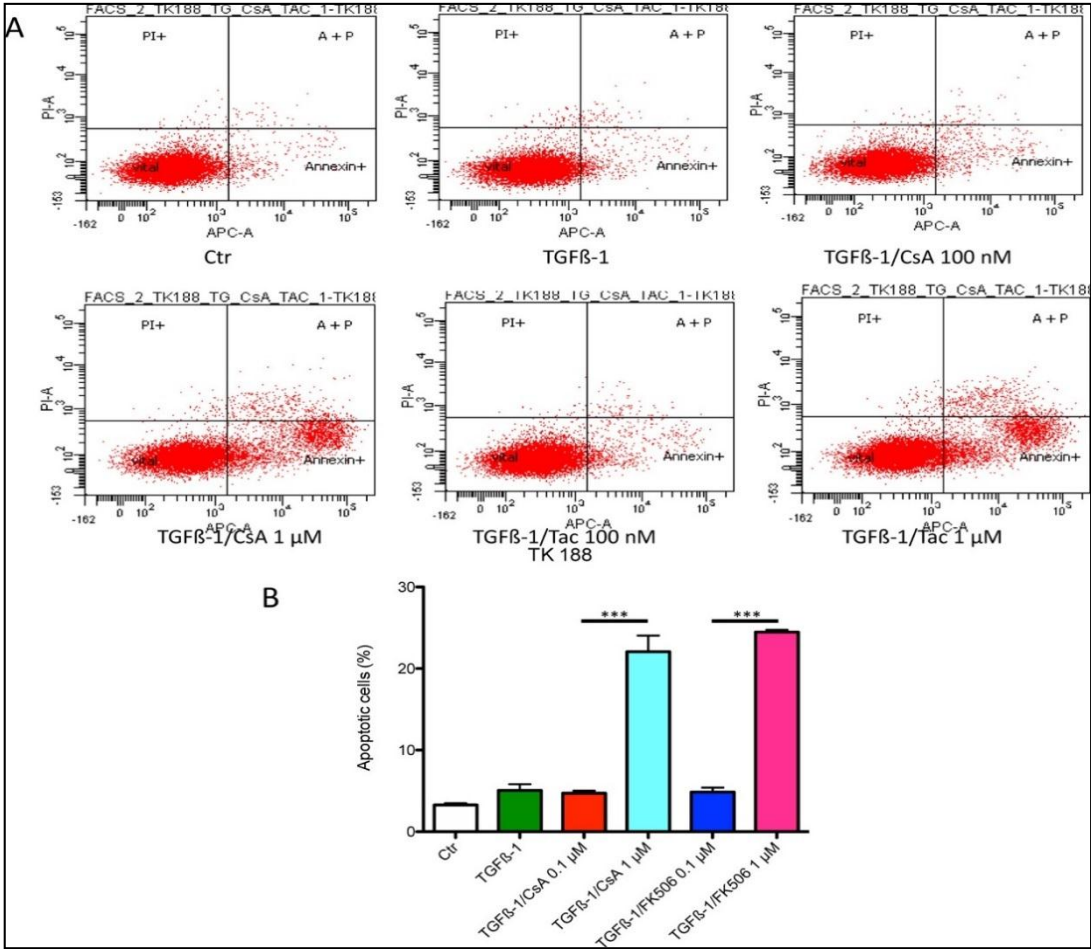



C

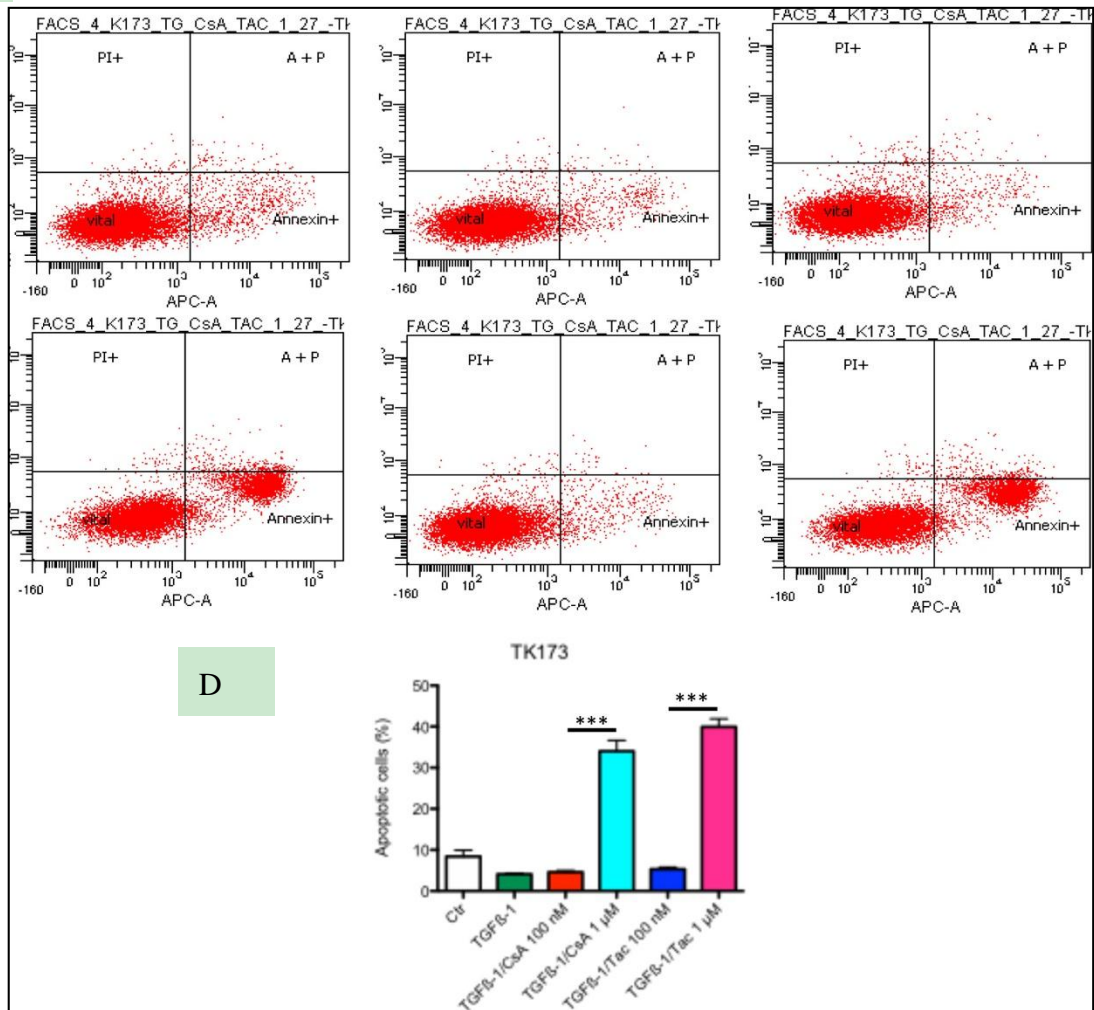

**Figure S6.** Low concentration of CsA and FK506 did not have significant impact on cell survival under TGFβ1 treatment. TK173 and TK188 cells were treated either with TGFβ1 alone or in combination with PPIases inhibitors (TGFβ1/CsA or TGFβ1/FK506). Two doses of CsA and FK506 (0.1 and 1 μM) were used for 72 h and Annexin V/PI staining was performed to examine the apoptotic cells. The apoptosis assay showed that the percentage of dead cells, under the TGFβ1/CsA or TGFβ1/FK506 combined treatment, depends on the inhibitor concentration. High concentrations of CsA or FK506 (1 μM) significantly increased the number of dead cells for both cell lines TK173 (A, B) and TK188 (C, D). (B, D) Percentage of apoptotic cells after treatment with indicated doses of CsA or FK506. \*\*\*  $p < 0.001$ .

**Table S1.** List of non-redundant proteins found to be differently secreted in the TGF $\beta$ 1-treated TK173 cells compared to untreated control. The gene name, accession number in Swiss-Prot, molecular weight, peptide mass fingerprinting (PMF), and MS/MS information are given.

|    | <u>Protein name</u>                                      | Gene Name | Swiss-Prot | Mass  | PMF-Score | PMF Sequence Coverage | MS/MS Score | Peptides |
|----|----------------------------------------------------------|-----------|------------|-------|-----------|-----------------------|-------------|----------|
| 1  | Galectin 1                                               | LGALS1    | P09382     | 14706 |           |                       | 153         | 10       |
| 2  | Coactosin-like protein                                   | COTL1     | Q14019     | 15935 | 63        | 10                    |             |          |
| 3  | Glutathione S-transferase P                              | GSTP1     | P09211     | 23341 | 59        | 10                    |             |          |
| 4  | Retinol-binding protein 4                                | RBP4      | P02753     | 22995 |           |                       | 68          | 4        |
| 5  | Ubiquitin carboxyl-terminal hydrolase isozyme L1         | UCHL1     | P09936     | 24808 | 73        | 14                    |             |          |
| 6  | Rho GDP-dissociation inhibitor 1                         | ARHGDA    | P52565     | 23193 | 70        | 12                    |             |          |
| 7  | Ran-specific GTPase-activating protein                   | RANBP1    | P43487     | 23296 |           |                       | 57          | 2        |
| 8  | Proteasome subunit alpha type-3                          | PSMA3     | P25788     | 28415 |           |                       | 115         | 6        |
| 9  | Tubulin-folding cofactor B                               | TBCB      | Q99426     | 27308 | 87        |                       |             |          |
| 10 | Chloride intracellular channel protein 1                 | CLTC1     | Q00299     | 26906 | 150       |                       | 106         | 4        |
| 11 | Inositol monophosphate 1                                 | IMPA1     | P29218     | 30169 |           |                       | 91          | 3        |
| 12 | Beta-2-microglobulin                                     | B2M       | P61769     | 13706 | 67        | 8                     | 182         | 8        |
| 13 | Protein S100-A11                                         | S100A11   | P31949     | 11733 |           |                       | 92          | 7        |
| 14 | GTP-binding nuclear protein Ran                          | RAN       | P62826     | 24408 | 81        | 11                    |             |          |
| 15 | Peptidyl-prolyl cis-trans isomerase A                    | PPIA      | P62937     | 18001 | 216       |                       |             |          |
| 16 | Heterogenous nuclear ribonucleoproteins A2/B1            | HNRNPA2B1 | P22626     | 37407 | 149       |                       |             |          |
| 17 | Carbonic anhydrase 1                                     | CA1       | P00915     | 28852 | 204       |                       |             |          |
| 18 | S-methyl-5'-thioadenosine phosphorylase                  | MTAP      | Q13126     | 31216 |           |                       | 146         | 7        |
| 19 | Glyceraldehyde-3-phosphate dehydrogenase                 | GAPDH     | P04406     | 36030 |           |                       | 96          | 3        |
| 20 | Guanine nucleotide-binding protein subunit beta-2-like 1 | GNB2L1    | P63244     | 35055 | 78        | 13                    |             |          |

|    |                                            |          |        |       |     |    |     |    |
|----|--------------------------------------------|----------|--------|-------|-----|----|-----|----|
| 21 | Proteasome subunit alpha type-1            | PSMA1    | P25786 | 29537 |     |    | 123 | 5  |
| 22 | Purine nucleoside phosphorylase            | NP       | P00491 | 32097 | 106 | 14 |     |    |
| 23 | Aldose reductase                           | AKR1B1   | P15121 | 35830 | 120 | 13 |     |    |
| 24 | S-formylglutathione hydrolase              | ESD      | P10768 | 31442 | 62  | 8  |     |    |
| 25 | Triosephosphate isomerase                  | TPI1     | P60174 | 26653 | 256 | 53 |     |    |
| 26 | Endoplasmic reticulum protein Erp29        | ERP29    | P30040 | 28975 |     |    | 220 | 6  |
| 27 | Metalloproteinase inhibitor 2              | TIMP2    | P16035 | 24383 |     |    | 44  | 2  |
| 28 | Ubiquitin-conjugating enzyme E2 N          | UBE2N    | P61088 | 17127 | 65  | 10 |     |    |
| 29 | Ubiquitin-conjugating enzyme E2 N variant2 | UBE2V2   | Q15819 | 16352 | 58  | 9  |     |    |
| 30 | 78 kDa glucose-regulated protein           | HSPA5    | P11021 | 72288 | 156 | 32 |     |    |
| 31 | Inorganic pyrophosphatase                  | PPA1     | Q15181 | 32639 | 88  | 11 | 48  | 3  |
| 32 | F-actin-capping protein subunit alpha-1    | CAPZA1   | P52907 | 32902 | 63  | 11 | 131 | 5  |
| 33 | Glyoxalase domain-containing protein 4     | GLOD4    | Q9HC38 | 34771 |     |    | 87  | 1  |
| 34 | Vimentin                                   | VIM      | P08670 | 53619 | 180 | 44 | 972 | 37 |
| 35 | Actin, cytoplasmic 1                       | ACTB     | P60709 | 41710 | 109 | 17 |     |    |
| 36 | Actin, cytoplasmic 2                       | ACTG1    | P63261 | 41766 | 74  | 13 | 343 | 8  |
| 37 | Plasminogen activator inhibitor 1          | SERPINE1 | P05121 | 45031 | 191 | 35 | 429 | 6  |
| 38 | Alpha-enolase                              | ENO1     | P06733 | 47139 | 160 | 28 | 396 | 16 |
| 39 | Glutathione synthetase                     | GSS      | P48637 | 52352 | 133 | 28 |     |    |
| 40 | Protein disulfide-isomerase A3             | PDIA3    | P30101 | 56747 | 114 | 21 | 454 | 4  |
| 41 | Tryptophanyl-tRNA synthetase, cytoplasmic  | WARS     | P23381 | 53132 |     |    | 173 | 8  |
| 42 | Cytosol aminopeptidase                     | LAP3     | P28838 | 56131 |     |    | 76  | 5  |
| 43 | T-complex protein 1 subunit beta           | CCT2     | P78371 | 57452 |     |    | 131 | 9  |
| 44 | D-3-phosphoglycerate dehydrogenase         | PHGDH    | O43175 | 56614 |     |    | 274 | 6  |
| 45 | Inosine-5' monophosphate dehydrogenase 2   | IMPDH2   | P12268 | 55770 |     |    | 84  | 5  |

|    |                                                       |        |        |        |     |    |     |    |
|----|-------------------------------------------------------|--------|--------|--------|-----|----|-----|----|
| 46 | UDP-glucose 6-dehydrogenase                           | UGDH   | O60701 | 54989  |     |    | 107 | 3  |
| 47 | Transforming growth factor-beta-induced protein ig-h3 | TGFBI  | Q15582 | 74634  | 127 | 19 |     |    |
| 48 | Pyruvate kinase isozymes M1/M2                        | PKM2   | P14618 | 57900  | 91  | 17 |     |    |
| 49 | Stress-induced-phosphoprotein 1                       | STIP1  | P31948 | 62599  | 69  | 19 | 244 | 7  |
| 50 | Transitional endoplasmic reticulum ATPase             | VCP    | P55072 | 89266  | 114 | 32 | 53  | 4  |
| 51 | <b>Alpha-fetoprotein</b>                              | AFP    | P02771 | 68543  | 78  | 10 | 140 | 8  |
| 52 | Stress-70 protein, mitochondrial                      | HSPA9  | P38646 | 73635  |     |    | 320 | 12 |
| 53 | Fibronectin                                           | FN1    | P02751 | 262442 | 78  | 33 | 52  | 3  |
| 54 | Collagen alpha-1 (I) chain                            | COL1A1 | P02452 | 138827 |     |    | 428 | 21 |
| 55 | Heat shock 70 kDa protein 4                           | HSPA4  | P34932 | 94271  | 86  | 23 | 47  | 4  |
| 56 | Myosine-9                                             | MYH9   | P35579 | 226392 |     |    | 241 | 12 |
| 57 | 60 kDa heat shock protein, mitochondrial              | HSPD1  | P10809 | 61016  | 101 | 20 |     |    |
| 58 | T-complex protein 1 subunit epsilon                   | CCT5   | P48643 | 59633  |     |    | 83  | 4  |
| 59 | Tubulin beta chain                                    | TUBB   | P07437 | 49639  | 261 | 44 |     |    |
| 60 | Eukaryotic translation initiation factor 3 subunit F  | EIF3F  | O00303 | 37540  |     |    | 205 | 6  |
| 61 | Cofilin 1                                             | CFL1   | P23528 | 18491  |     |    | 116 | 3  |

**Table S2.** List of non-redundant proteins found to be differently secreted in the ANG II-treated TK173 cells compared to untreated control. The gene name, accession number in Swiss-Prot, molecular weight, peptide mass fingerprinting (PMF), and MS/MS information are given.

|    | <u>Protein name</u>                                                 | <b>Gene Name</b> | <b>Swiss-Prot</b> | <u>Mass</u> | <b>PMF-Score</b> | <b>PMF Sequence Coverage</b> | <b>MS/MS Score</b> | <u>Peptides</u> |
|----|---------------------------------------------------------------------|------------------|-------------------|-------------|------------------|------------------------------|--------------------|-----------------|
| 1  | Translationally-controlled tumor protein 1                          | TPT1             | P13693            | 19583       |                  |                              | 352                | 23              |
| 2  | Heme-binding protein 1                                              | HEBP1            | Q9NRV9            | 21084       |                  |                              | 111                | 7               |
| 3  | Basment membrane-specific heparan sulfate proteoglycan core protein | HSPG2            | P98160            | 468500      |                  |                              | 313                | 13              |
| 4  | Thioredoxine-dependent peroxide reductase, mitochondrial            | PRDX3            | P30048            | 27675       |                  |                              | 110                | 4               |
| 5  | Heterogenous nuclear ribonucleoproteins A2/B1                       | HNRNPA2B1        | P22626            | 37407       |                  |                              | 149                | 12              |
| 6  | Peptidyl-prolyl cis-trans isomerase A                               | PPIA             | P62937            | 18001       |                  |                              | 216                | 20              |
| 7  | UPF0556 protein C19 or f10                                          | C19 or f10       | Q969H8            | 18783       |                  |                              | 135                | 6               |
| 8  | Transgelin                                                          | TAGLN            | Q01995            | 22516       |                  |                              | 301                | 15              |
| 9  | Carbonic anhydrase 1                                                | CA1              | P00915            | 28852       |                  |                              | 204                | 8               |
| 10 | Chloride intracellular channel protein 1                            | CLIC1            | Q00299            | 26906       |                  |                              | 234                | 13              |
| 11 | EF-hand domain-containing protein D2                                | EFHD2            | Q96C19            | 26680       |                  |                              | 74                 | 12              |
| 12 | Cathepsin L1                                                        | CTSL1            | P07711            | 37540       |                  |                              | 76                 | 12              |
| 13 | Actin, cytoplasmic 1                                                | ACTB             | P60709            | 41710       |                  |                              | 1070               | 64              |
| 14 | Plasminogen activator inhibitor 1                                   | SERPINE1         | P05121            | 45031       |                  |                              | 425                | 24              |
| 15 | Tubulin beta-2C chain                                               | TUBB2C           | Q8N6N5            | 49799       |                  |                              | 841                | 46              |
| 16 | Tubulin beta chain                                                  | TUBB             | P07437            | 49639       |                  |                              | 305                | 20              |
| 17 | 78 kDa glucose-regulated protein                                    | HSPA5            | P11021            | 72288       |                  |                              | 1038               | 45              |
| 18 | Protein disulfide-isomerase A3                                      | PDIA3            | P30101            | 56747       |                  |                              | 140                | 28              |
| 19 | Glutathion S-transferase P                                          | GSTP1            | P09211            | 23341       | 95               | 12                           | 327                | 16              |
| 20 | Thioredoxin domain-containing protein 17                            | TXNDC17          | Q0BRA2            | 13932       |                  |                              | 313                | 11              |

|    |                                                     |        |        |        |     |    |     |    |
|----|-----------------------------------------------------|--------|--------|--------|-----|----|-----|----|
| 21 | Fibronectin                                         | FN1    | P02751 | 262442 |     |    | 707 | 47 |
| 22 | Collagen alpha-1 (VI) chain                         | COL6A1 | P12109 | 108462 |     |    | 726 | 34 |
| 23 | S-formylglutathione hydrolase                       | ESD    | P10768 | 31442  |     |    | 157 | 12 |
| 24 | Serine-threonine kinase receptor-associated protein | STRAP  | Q0Y3F4 | 38414  |     |    | 53  | 6  |
| 25 | Tubulin alpha-1A chain                              | TUBA1A | Q71U36 | 50104  |     |    | 341 | 17 |
| 26 | Procollagen C-endopeptidase enhancer-1              | PCOLCE | Q15113 | 47942  |     |    | 196 | 13 |
| 27 | Calsyntenin-1                                       | CLSTN1 | Q94985 | 109724 |     |    | 374 | 25 |
| 28 | Coactosin-like protein                              | COTL1  | Q14019 | 15935  |     |    | 173 | 18 |
| 29 | Eukaryotic translation initiation factor 5A-1       | EIF5A  | P63241 | 16821  |     |    | 117 | 6  |
| 30 | Lactoylglutathione lyase                            | GLO1   | Q04760 | 20764  | 58  | 10 |     |    |
| 31 | Stathmin                                            | STMN1  | P16949 | 17292  |     |    | 188 | 10 |
| 32 | Elongation factor 1-gamma                           | EEF1G  | P26641 | 50087  |     |    | 207 | 8  |
| 33 | Lamin-B1                                            | LMNB1  | P20700 | 66408  | 85  | 17 |     |    |
| 34 | Proteasome subunit alpha type-3                     | PSMA3  | P25788 | 28415  |     |    | 74  | 7  |
| 35 | 3-hydroxyisobutyryl-CoA hydrolase, mitochondrial    | HIBCH  | Q6NVY1 | 43454  | 61  | 12 |     |    |
| 36 | Proteasome subunit beta type-4                      | PSMB4  | P28070 | 29185  | 71  | 9  |     |    |
| 37 | Peroxiredoxin-2                                     | PRDX2  | P32119 | 21878  | 90  | 18 |     |    |
| 38 | Proteasome subunit alpha type-2                     | PSMA2  | P25787 | 25899  |     |    | 144 | 10 |
| 39 | Peroxiredoxin-1                                     | PRDX1  | Q06830 | 22096  |     |    | 199 | 15 |
| 40 | Proteasome subunit beta type-2                      | PSMB2  | P49721 | 22822  |     |    | 183 | 10 |
| 41 | Triosephosphate isomerase                           | TPI1   | P60174 | 26653  |     |    | 579 | 17 |
| 42 | Transgelin-2                                        | TAGLN2 | P37802 | 22377  | 117 | 14 |     |    |
| 43 | 60 kDa heat shock protein, mitochondrial            | HSPD1  | P10809 | 61016  | 195 | 27 |     |    |
| 44 | FK506-binding protein 4                             | FKBP4  | Q02790 | 51772  | 87  | 12 | 35  | 7  |
| 45 | T-complex protein 1 subunit epsilon                 | CCT5   | P48643 | 59633  |     |    | 174 | 17 |

|    |                                                         |         |        |        |     |    |     |    |
|----|---------------------------------------------------------|---------|--------|--------|-----|----|-----|----|
| 46 | Dihydropyrimidinase-related protein 2                   | DPYSL2  | Q16555 | 62255  | 67  | 14 |     |    |
| 47 | Tryptophanyl-tRNA synthetase, cytoplasmic               | WARS    | P23381 | 53132  | 98  | 13 |     |    |
| 48 | Alpha-enolase                                           | ENO1    | P06733 | 47139  | 170 | 22 |     |    |
| 49 | HLA class I histocompatibility antigen A-24 alpha chain | HLA-A   | P01892 | 40663  | 105 | 13 |     |    |
| 50 | Eukaryotic translation initiation factor 3 subunit I    | EIF3I   | Q13347 | 36479  | 80  | 11 |     |    |
| 51 | N(G), N(G)-dimethylarginine dimethylaminohydrolase 1    | DDAH1   | Q94760 | 31102  |     |    | 141 | 9  |
| 52 | Inorganic pyrophosphatase                               | PPA1    | Q15181 | 32639  | 127 | 17 |     |    |
| 53 | F-actin-capping protein subunit alpha-2                 | CAPZA2  | P47755 | 32929  | 98  | 12 |     |    |
| 54 | Fascin                                                  | FSCN1   | Q16658 | 54496  |     |    | 375 | 12 |
| 55 | Dihydrolipoyl dehydrogenase, mitochondrial              | DLD     | P09622 | 54116  |     |    | 209 | 10 |
| 56 | Cytosol aminopeptidase                                  | LAP3    | P28838 | 56131  |     |    | 887 | 30 |
| 57 | Stress-induced-phosphoprotein 1                         | STIP1   | P31948 | 62599  |     |    | 369 | 17 |
| 58 | Bifunctional purine biosynthesis protein PUR+1          | ATIC    | P31939 | 64575  |     |    | 277 | 12 |
| 59 | Putative fatty acid-binding protein 5-like protein 3    | FABP5L3 | A8MUU  | 11292  | 59  | 6  |     |    |
| 60 | Lactotransferrin                                        | LTF     | P02788 | 78132  |     |    | 71  | 3  |
| 61 | Gelsolin                                                | GSN     | P06396 | 85644  | 86  | 11 |     |    |
| 62 | Filamin-B                                               | FLNB    | O75369 | 278021 |     |    | 58  | 3  |
| 63 | Filamin-A                                               | FLNA    | P21333 | 280564 | 107 | 28 |     |    |
| 64 | Complement C1r subcomponent                             | C1R     | P00736 | 80067  | 69  | 14 |     |    |
| 65 | Transitional endoplasmic reticulum ATPase               | VCP     | P55072 | 89266  | 98  | 23 | 191 | 21 |
| 66 | Heat shock 70 kDa protein 4                             | HSPA4   | P34932 | 94271  | 111 | 19 | 187 | 17 |

**Table S3.** List of non-redundant proteins found to be differently secreted in the PDGF-treated TK173 cells compared to untreated control. The gene name, accession number in Swiss-Prot, molecular weight, peptide mass fingerprinting (PMF), and MS/MS information are given.

| Spot nr. | Protein name                                         | Gene Name       | Swiss-Prot | Mass  | PMF Score | PMF Sequence Coverage | MS/MS Score | Peptides |
|----------|------------------------------------------------------|-----------------|------------|-------|-----------|-----------------------|-------------|----------|
| 1        | Protein S100-A6                                      | S100A6          | P06703     | 10173 |           |                       | 105         | 4        |
| 2        | Myotrophin                                           | MTPN            | P58546     | 12887 |           |                       | 59          | 1        |
| 3        | Coactosin-like protein                               | COTL1           | Q14019     | 15935 | 71        | 11                    | 173         |          |
| 4        | Rho GDP-dissociation inhibitor 1                     | ARHGDI1         | P52565     | 23193 | 94        | 11                    |             |          |
| 5        | Glutathione S-transferase P                          | GSTP1           | P09211     | 23341 | 63        | 7                     | 281         | 8        |
| 6        | Peroxiredoxin-2                                      | PRDX2           | P32119     | 21878 | 90        |                       | 46          | 2        |
| 7        | Proteasome subunit alpha type-3                      | PSMA3           | P25788     | 28415 |           |                       | 44          | 2        |
| 8        | Chloride intracellular channel protein 1             | CLIC1           | Q00299     | 26906 | 76        | 9                     | 189         | 5        |
| 9        | Tubulin-folding cofactor B                           | TBCB            | Q99426     | 27308 |           |                       | 87          | 3        |
| 10       | Coatomer subunit epsilon                             | COPE            | O14579     | 34460 | 69        | 11                    |             |          |
| 11       | Eukaryotic translation initiation factor 3 subunit I | EIF3I           | Q13347     | 36479 | 80        |                       | 93          | 4        |
| 12       | Alpha-enolase                                        | ENO1            | P06733     | 47139 | 140       | 25                    |             |          |
| 13       | Plasminogen activator inhibitor 1                    | SERPINE1        | P05121     | 45031 | 200       | 21                    | 513         | 19       |
| 14       | Protein disulfide-isomerase A3                       | PDIA3           | P30101     | 56747 | 110       | 22                    | 147         | 3        |
| 15       | FK 506-binding protein 4                             | FKBP4           | Q02790     | 51772 |           |                       | 44          | 3        |
| 16       | Alpha-1-antitrypsin                                  | <b>SERPINA1</b> | P01009     | 46737 |           |                       | 519         | 18       |
| 17       | Nucleobindin-1                                       | NUCB1           | Q02818     | 53846 | 105       | 20                    |             |          |
| 18       | 26S protease regulatory subunit 6B                   | PSMC4           | P43686     | 47337 |           |                       | 65          | 5        |
| 19       | Actin, cytoplasmic 1                                 | ACTB            | P60709     | 41710 |           |                       | 116         | 6        |
| 20       | Eukaryotic translation initiation factor 3 subunit F | EIF3F           | O00303     | 37540 |           |                       | 56          | 4        |



|    |                                            |        |        |        |     |    |     |    |
|----|--------------------------------------------|--------|--------|--------|-----|----|-----|----|
| 21 | Elongation factor 2                        | EEF2   | P13639 | 95277  |     |    | 54  | 3  |
| 22 | Tryptophanyl-tRNA synthetase, cytoplasmic  | WARS   | P23381 | 53132  | 174 | 18 |     |    |
| 23 | Pre-mRNA-processing factor 19              | PRPF19 | Q9UMS4 | 55146  |     |    | 112 | 4  |
| 24 | Cytosol aminopeptidase                     | LAP3   | P28838 | 56131  |     |    | 291 | 12 |
| 25 | Inosine-5' monophosphate dehydrogenase 2   | IMPDH2 | P12268 | 55770  |     |    | 89  | 3  |
| 26 | Dihydrolipoyl dehydrogenase, mitochondrial | DLD    | P09622 | 54116  |     |    | 193 | 5  |
| 27 | Myosin-9                                   | MYH9   | P35579 | 226392 |     |    | 206 | 12 |
| 28 | Transitional endoplasmic reticulum ATPase  | VCP    | P55072 | 89266  | 145 | 32 |     |    |
| 29 | Collagen alpha-1 (VI) chain                | COL6A1 | P12109 | 108462 | 60  | 15 | 247 | 9  |
| 30 | Fibronectin                                | FN1    | P02751 | 262442 |     |    | 574 |    |
| 31 | Cofilin 1                                  | CFL1   | P23528 | 18491  |     |    | 149 | 5  |
| 32 | Peptidyl-prolyl cis-trans isomerase A      | PPIA   | P62937 | 18001  | 96  | 10 | 186 | 10 |
| 33 | Collagen-alpha-2 (VI) chain                | COL6A2 | P12110 | 108512 | 116 | 23 | 103 | 4  |
| 34 | Stress-induced-phosphoprotein 1            | STIP1  | P31948 | 62599  |     |    | 68  | 3  |
| 35 | ATP synthase subunit beta, mitochondrial   | ATP5B  | P06576 | 56525  |     |    | 171 | 7  |
| 36 | Nucleoside diphosphate kinase A            | NME1   | P15531 | 17138  | 86  | 11 |     |    |
| 37 | Profilin-1                                 | PFN1   | P07737 | 15045  |     |    | 156 | 4  |
| 38 | Lysozyme C                                 | LYZ    | P61626 | 16526  | 61  | 10 |     |    |
| 39 | Phosphatidylethanolamine-binding protein-1 | PEBP1  | P30086 | 21044  |     |    | 136 | 4  |
| 40 | Triosephosphate isomerase                  | TPI1   | P60174 | 26653  | 94  | 24 | 579 |    |
| 41 | Enoyl-CoA hydratase, mitochondrial         | ECHS1  | P30084 | 31367  |     |    | 117 | 3  |

**Table S4.** List of potential interaction partner of PPIA identified and quantified using mass spectrometry. IEP: isoelectric point; mw: molecular weight; CTR: control; TGF: TGF $\beta$ 1 treated.

| description                                                           | Gene name | accession | entry      | IEP   | mw        | CTR    | TGF    |
|-----------------------------------------------------------------------|-----------|-----------|------------|-------|-----------|--------|--------|
| Peptidyl-prolyl cis-trans isomerase A                                 | PPIA      | P62937    | PPIA_HUMA  | 7,85  | 18240,64  | 411,95 | 568,08 |
| Heterogeneous nuclear ribonucleoprotein U                             | HNRNPU    | Q00839    | HNRPU_HUN  | 5,66  | 91325,94  |        | 329,21 |
| Ubiquitin-40S ribosomal protein S27a                                  | RPS27A    | P62979    | RS27A_HUM  | 10,24 | 18307,10  |        | 135,32 |
| Galectin-1                                                            | LGALS1    | P09382    | LEG1_HUMA  | 5,15  | 15057,89  | 61,14  | 103,95 |
| E3 SUMO-protein ligase RanBP2                                         | RANBP2    | P49792    | RBP2_HUMA  | 5,81  | 362590,78 |        | 78,65  |
| Heat shock protein 75 kDa_mitochondrial                               | TRAP1     | Q12931    | TRAP1_HUM  | 8,31  | 80395,28  | 11,33  | 69,58  |
| Fibronectin                                                           | FN1       | P02751    | FINC_HUMA  | 5,36  | 266217,54 |        | 64,91  |
| Plasminogen activator inhibitor 1                                     | SERPINE1  | P05121    | PAI1_HUMA  | 6,79  | 45117,13  | 5,66   | 56,30  |
| Bifunctional purine biosynthesis protein PURH                         | ATIC      | P31939    | PUR9_HUMA  | 6,30  | 65129,21  | 10,66  | 43,70  |
| Intercellular adhesion molecule 1                                     | ICAM1     | P05362    | ICAM1_HUM  | 7,92  | 58623,66  | 18,39  | 40,33  |
| Splicing factor 3B subunit 1                                          | SF3B1     | O75533    | SF3B1_HUM  | 6,69  | 146572,02 | 2,43   | 36,54  |
| Myosin-10                                                             | MYH10     | P35580    | MYH10_HUN  | 5,28  | 229968,92 | 7,87   | 31,49  |
| Peptidyl-prolyl cis-trans isomerase B                                 | PIIB      | P23284    | PIIB_HUMA  | 10,06 | 23799,61  | 14,31  | 29,33  |
| Ras-related protein Rap-1A                                            | RAP1A     | P62834    | RAP1A_HUM  | 6,53  | 21329,38  |        | 28,94  |
| 40S ribosomal protein S20                                             | RPS20     | P60866    | RS20_HUMA  | 10,71 | 13486,79  |        | 27,24  |
| Aldo-keto reductase family 1 member B1                                | AKR1B1    | P15121    | ALDR_HUMA  | 6,59  | 36252,64  | 8,73   | 27,09  |
| Brain acid soluble protein 1                                          | BASP1     | P80723    | BASP1_HUM  | 4,42  | 22693,42  | 6,91   | 21,55  |
| Myosin-11                                                             | MYH11     | P35749    | MYH11_HUN  | 5,25  | 228195,03 | 4,50   | 21,10  |
| Ras-related C3 botulinum toxin substrate 1                            | RAC1      | P63000    | RAC1_HUMA  | 8,58  | 21849,32  |        | 20,56  |
| Tumor protein D54                                                     | TPD52L2   | O43399    | TPD54_HUM  | 5,08  | 22294,78  | 4,45   | 13,04  |
| Integrin alpha-5                                                      | ITGA5     | P08648    | ITA5_HUMA  | 5,41  | 115677,14 | 4,45   | 11,68  |
| Cytoplasmic dynein 1 heavy chain 1                                    | DYNC1H1   | Q14204    | DYHC1_HUM  | 5,99  | 535145,98 |        | 10,62  |
| Bifunctional glutamate/proline--tRNA ligase                           | EPRS      | P07814    | SYEP_HUMA  | 7,00  | 172187,91 |        | 9,30   |
| CD166 antigen                                                         | ALCAM     | Q13740    | CD166_HUM  | 5,87  | 65786,70  | 4,70   | 9,04   |
| Serpin B12                                                            | SERPINB12 | Q96P63    | SPB12_HUM  | 5,22  | 46675,69  |        | 8,14   |
| Small nuclear ribonucleoprotein F                                     | SNRPF     | P62306    | RUXF_HUMA  | 4,43  | 9782,26   |        | 8,03   |
| Integrin alpha-V OS=Homo sapiens                                      | ITGAV     | P06756    | ITAV_HUMA  | 5,32  | 117121,56 |        | 7,89   |
| Thrombospondin-1                                                      | THBS1     | P07996    | TSP1_HUMA  | 4,53  | 133374,73 |        | 7,83   |
| Proteasome subunit beta type-1                                        | PSMB1     | P20618    | PSB1_HUMA  | 8,22  | 26717,54  |        | 7,69   |
| Protein S100-A10                                                      | S100A10   | P60903    | S10AA_HUM  | 7,27  | 11317,21  |        | 7,46   |
| S-phase kinase-associated protein 1                                   | SKP1      | P63208    | SKP1_HUMA  | 4,20  | 18829,12  |        | 7,42   |
| Splicing factor_proline- and glutamine-rich                           | SEPO      | P23246    | SFPQ_HUMA  | 9,95  | 76263,60  |        | 7,39   |
| LIM and SH3 domain protein 1                                          | LASP1     | Q14847    | LASP1_HUM  | 6,70  | 30116,41  |        | 7,30   |
| Coatomer subunit beta                                                 | COPB1     | P53618    | COPB_HUMA  | 5,66  | 108282,98 |        | 6,84   |
| Isoleucine--tRNA ligase_cytoplasmic                                   | IARS      | P41252    | SYIC_HUMAF | 5,77  | 145809,96 |        | 6,35   |
| Heterogeneous nuclear ribonucleoprotein D-like                        | HNRNPDL   | Q14979    | HNRDL_HUM  | 9,96  | 46608,67  |        | 6,26   |
| Tropomyosin beta chain                                                | TPM2      | P07951    | TPM2_HUMA  | 4,46  | 32964,85  |        | 5,84   |
| GTPase NRas                                                           | NRAS      | P01111    | RASN_HUMA  | 4,82  | 21514,35  |        | 5,82   |
| Cystatin-A                                                            | CSTA      | P01040    | CYTA_HUMA  | 5,22  | 11006,51  |        | 5,36   |
| Protein Niban                                                         | FAM129A   | Q9BZQ8    | NIBAN_HUM  | 4,54  | 104104,30 |        | 5,10   |
| ELAV-like protein 1                                                   | ELAVL1    | Q15717    | ELAV1_HUM  | 9,57  | 36263,04  |        | 5,07   |
| Podocalyxin                                                           | PODXL     | O00592    | PODXL_HUM  | 5,16  | 59091,56  |        | 4,99   |
| Putative heat shock protein HSP 90-beta 2                             | HSP90AB2P | Q58FF8    | H90B2_HUM  | 4,59  | 44520,09  |        | 4,97   |
| Ephrin type-A receptor 2                                              | EPHA2     | P29317    | EPHA2_HUM  | 5,83  | 109749,33 |        | 4,64   |
| Collagen alpha-1(VI) chain                                            | COL6A1    | P12109    | CO6A1_HUM  | 5,09  | 109670,06 |        | 4,58   |
| Transportin-1                                                         | TNPO1     | Q92973    | TNPO1_HUM  | 4,65  | 103837,95 |        | 4,46   |
| Phosphatidylinositol transfer protein beta isoform                    | PITPNB    | P48739    | PIPNB_HUM  | 6,47  | 31825,26  |        | 4,46   |
| Thioredoxin-dependent peroxide reductase_mitochondrial                | PRDX3     | P30048    | PRDX3_HUM  | 7,70  | 28034,84  |        | 4,13   |
| Putative heat shock protein HSP 90-beta 4                             | HSP90AB4P | Q58FF6    | H90B4_HUM  | 4,45  | 58891,78  |        | 4,00   |
| Phosphoribosylformylglycinamide synthase                              | PFAS      | O15067    | PUR4_HUMA  | 5,41  | 146388,37 |        | 3,94   |
| Epidermal growth factor receptor                                      | EGFR      | P00533    | EGFR_HUMA  | 6,27  | 137699,25 |        | 3,85   |
| Glucosidase 2 subunit beta                                            | PRKCSH    | P14314    | GLU2B_HUM  | 4,13  | 60394,97  |        | 3,83   |
| Peripherin                                                            | PRPH      | P41219    | PERI_HUMA  | 5,21  | 53765,00  |        | 3,74   |
| Ras GTPase-activating-like protein IQGAP3                             | IQGAP3    | Q86VI3    | IQGA3_HUM  | 7,37  | 185383,40 |        | 3,64   |
| Hippocalcin-like protein 1                                            | HPCAL1    | P37235    | HPCL1_HUM  | 5,03  | 22427,29  |        | 3,54   |
| Glial fibrillary acidic protein                                       | GFAP      | P14136    | GFAP_HUMA  | 5,26  | 49937,33  |        | 3,41   |
| Ras-related protein Ral-B                                             | RALB      | P11234    | RALB_HUMA  | 6,26  | 23522,64  |        | 3,38   |
| Structural maintenance of chromosomes protein 4                       | SMC4      | Q9NTJ3    | SMC4_HUMA  | 6,38  | 147866,56 |        | 3,34   |
| Aminoacyl tRNA synthase complex-interacting multifunctional protein 2 | AIMP2     | Q13155    | AIMP2_HUM  | 8,27  | 35691,02  |        | 3,31   |
| Ras suppressor protein 1                                              | RSU1      | Q15404    | RSU1_HUMA  | 9,23  | 31540,35  |        | 3,31   |
| Ras-related protein Rab-23                                            | RAB23     | Q9ULC3    | RAB23_HUM  | 6,24  | 26887,39  |        | 3,21   |
| Collagen alpha-2(VI) chain                                            | COL6A2    | P12110    | CO6A2_HUM  | 5,81  | 109777,13 |        | 2,90   |
| Structural maintenance of chromosomes protein 2                       | SMC2      | O95347    | SMC2_HUMA  | 8,73  | 136169,56 |        | 2,75   |
| FACT complex subunit SPT16                                            | SUPT16H   | Q9Y5B9    | SP16H_HUM  | 5,37  | 120484,25 |        | 2,71   |
| Aminopeptidase N                                                      | ANPEP     | P15144    | AMPN_HUM   | 5,16  | 109938,95 |        | 2,62   |
| Glycogen phosphorylase_brain form                                     | PYGB      | P11216    | PYGB_HUMA  | 6,43  | 97380,45  |        | 2,54   |
| CAD protein                                                           | CAD       | P27708    | PYR1_HUMA  | 6,03  | 245322,25 |        | 2,49   |
| DNA replication licensing factor MCM2                                 | MCM2      | P49736    | MCM2_HUM   | 5,20  | 102580,63 |        | 2,45   |
| Signal transducer and activator of transcription 2                    | STAT2     | P52630    | STAT2_HUM  | 5,20  | 98657,73  |        | 2,44   |
| Valine--tRNA ligase                                                   | VARS      | P26640    | SYVC_HUMA  | 7,37  | 141730,79 |        | 2,30   |
| Peroxidasin homolog                                                   | PXDN      | Q92626    | PXDN_HUMA  | 6,79  | 167898,08 |        | 2,23   |
| Microtubule-associated protein 4                                      | MAP4      | P27816    | MAP4_HUM   | 5,14  | 121518,45 |        | 2,15   |
| Myoferlin                                                             | MYOF      | Q9NZM1    | MYOF_HUM   | 5,79  | 236248,81 |        | 2,13   |
| Kinesin-like protein KIF23                                            | KIF23     | Q02241    | KIF23_HUMA | 8,59  | 111085,51 |        | 2,03   |
| Procollagen-lysine_2-oxoglutarate 5-dioxygenase 2                     | PLOD2     | O00469    | PLOD2_HUM  | 6,27  | 85427,10  |        | 1,45   |
